# Supplementary material for: Leisure time physical activity is associated with improved diastolic heart function and is partly mediated by unsupervised quantified metabolic health
Source: PubMed Central journal article supplement — BMJ Open Sport Exerc Med. 2024 Feb 6;10(1):e001778. doi: 10.1136/bmjsem-2023-001778 (PMC10860076; doi:10.1136/bmjsem-2023-001778), 2024-02-06
Supplement: bmjsem-2023-001778supp001.pdf [file bmjsem-2023-001778supp001.pdf]

## Supplementary

The following settings were used during MRI acquisition:

### Diastolic function

Repetition/echo time (TR/TE) 6.5/1 ms, flip angle (FA) 20°, slice thickness 8 mm, field of view (FOV) 350x350 mm<sup>2</sup>, matrix size 256x256, velocity-encoding gradient 150 cm/s.

### Cardiac morphology

TR/TE 3.4/1.7 ms, FA 35°, slice thickness 10 mm, no slice gap, field of view (FOV) 400x400 mm<sup>2</sup> and matrix size 256x256.

### Adiposity

TR/TE 300/20 ms, FA 90°, slice thickness 10 mm and slice gap 2 mm. For post-processing analysis, an in-house-developed software was used (MASS; Medis, Leiden, the Netherlands).
