# Supplementary material for: Leisure time physical activity is associated with improved diastolic heart function and is partly mediated by unsupervised quantified metabolic health
Source: PubMed Central journal article supplement — BMJ Open Sport Exerc Med. 2024 Feb 6;10(1):e001778. doi: 10.1136/bmjsem-2023-001778 (PMC10860076; doi:10.1136/bmjsem-2023-001778), 2024-02-06
Supplement: bmjsem-2023-001778supp002.pdf [file bmjsem-2023-001778supp002.pdf]

**Table S1 Associations of LTPA (MET-min/week) with cardiovascular parameters.**

| Outcome                      | Men     |             |         | Women   |             |         |
|------------------------------|---------|-------------|---------|---------|-------------|---------|
|                              | $\beta$ | 95% CI      | p-value | $\beta$ | 95% CI      | p-value |
| <i>Cardiac morphology</i>    |         |             |         |         |             |         |
| LV mass (g)                  |         |             |         |         |             |         |
| Crude                        | 0.09    | 0.02, 0.17  | 0.015   | 0.09    | 0.02, 0.17  | 0.018   |
| Adjusted                     | 0.11    | 0.03, 0.19  | 0.010   | 0.10    | 0.02, 0.18  | 0.010   |
| LV mass index                |         |             |         |         |             |         |
| Crude                        | 0.15    | 0.07, 0.23  | <0.001  | 0.17    | 0.07, 0.27  | 0.001   |
| Adjusted                     | 0.16    | 0.07, 0.42  | <0.001  | 0.17    | 0.27, 3.18  | 0.002   |
| <i>Cardiac hemodynamics</i>  |         |             |         |         |             |         |
| LV end-systolic volume (ml)  |         |             |         |         |             |         |
| Crude                        | 0.14    | 0.03, 0.24  | 0.010   | 0.07    | -0.01, 0.14 | 0.078   |
| Adjusted                     | 0.15    | 0.03, 0.26  | 0.011   | 0.10    | 0.02, 0.18  | 0.019   |
| LV end-diastolic volume (ml) |         |             |         |         |             |         |
| Crude                        | 0.18    | 0.08, 0.28  | <0.001  | 0.08    | -0.02, 0.17 | 0.119   |
| Adjusted                     | 0.21    | 0.15, 0.38  | <0.001  | 0.11    | 0.02, 0.22  | 0.025   |
| LV stroke volume (ml)        |         |             |         |         |             |         |
| Crude                        | 0.17    | 0.07, 0.27  | 0.001   | 0.07    | -0.05, 0.18 | 0.264   |
| Adjusted                     | 0.21    | 0.10, 0.31  | <0.001  | 0.10    | -0.02, 0.22 | 0.090   |
| Ejection Fraction (%)        |         |             |         |         |             |         |
| Crude                        | -0.02   | -0.12, 0.08 | 0.746   | -0.05   | -0.15, 0.06 | 0.384   |
| Adjusted                     | 0.02    | -0.11, 0.14 | 0.814   | -0.06   | -0.17, 0.05 | 0.290   |
| Cardiac output (L/min)       |         |             |         |         |             |         |
| Crude                        | 0.09    | 0.01, 0.18  | 0.036   | 0.03    | -0.10, 0.15 | 0.677   |
| Adjusted                     | 0.11    | 0.03, 0.20  | 0.012   | 0.03    | -0.10, 0.15 | 0.643   |

Numbers represents linear regression coefficients and 95% confidence intervals, weighted toward the BMI distribution of the general population. Regression coefficients reflects the change in outcome per 1 SD of leisure time physical activity (LTPA) in MET-minutes/week: 1999 min in men/1870 min in women. Crude models were adjusted for age, sex, smoking, ethnicity and education. SD = standard deviation, LV = left ventricle. Unadjusted values for multiple comparisons with  $p < 0.05$  were considered significant. *Italic depicted values meet the Bonferroni corrected significance level of  $p < 0.002$ .*

**Table S2 Sensitivity analyses of the associations of LTPA (MET-min/week) with diastolic function after exclusion of participants with diabetes mellitus.**

| Outcome                   | Men     |             |         | Women   |             |         |
|---------------------------|---------|-------------|---------|---------|-------------|---------|
|                           | $\beta$ | 95% CI      | p-value | $\beta$ | 95% CI      | p-value |
| <i>Diastolic function</i> |         |             |         |         |             |         |
| E/A ratio                 |         |             |         |         |             |         |
| Crude                     | 0.091   | -0.04, 0.23 | 0.184   | 0.03    | -0.20, 0.26 | 0.795   |
| Adjusted                  | 0.024   | 0.02, 0.33  | 0.024   | 0.15    | -0.02, 0.33 | 0.083   |
| E-DT (ms)                 |         |             |         |         |             |         |
| Crude                     | 0.09    | -0.01, 0.19 | 0.089   | 0.10    | -0.01, 0.21 | 0.075   |
| Adjusted                  | 0.11    | 0.00, 0.22  | 0.057   | 0.16    | 0.04, 0.28  | 0.010   |

Results represents linear regression coefficients and 95% confidence intervals, weighted toward the BMI distribution of the general population.  $\beta$ , regression coefficients reflect the difference in outcome per 1 SD of leisure time physical activity (LTPA) in MET-minutes/week: 2014 min in men/1874 min in women. Crude models were adjusted for age, sex, smoking, ethnicity and education. E-DT = E-wave deceleration time, ms = milliseconds, LV = left ventricle. Unadjusted values for multiple comparisons with  $p < 0.05$  were considered significant. *Italic depicted values meet the Bonferroni corrected significance level of  $p < 0.004$ .*

**Table S3 Mediation by metabolic load on cardiovascular parameters.**

| Outcome                           | Men             |                |                         |         | Women           |                |                         |         |
|-----------------------------------|-----------------|----------------|-------------------------|---------|-----------------|----------------|-------------------------|---------|
|                                   | Indirect effect | 95% CI         | Proportion mediated (%) | p-value | Indirect effect | 95% CI         | Proportion mediated (%) | p-value |
| <i>Cardiac morphology</i>         |                 |                |                         |         |                 |                |                         |         |
| LV mass (g)                       | -0.020          | -0.037;- 0.004 | 18                      | 0.017   | -0.018          | -0.035;-0.001  | 18                      | 0.033   |
| LV mass index (g/m <sup>2</sup> ) | 0.003           | -0.011;0.017   | 0                       | 0.663   | 0.026           | 0.00; 0.053    | 0                       | 0.052   |
| <i>Cardiac hemodynamics</i>       |                 |                |                         |         |                 |                |                         |         |
| LV end-systolic volume (ml)       | 0.001           | -0.015;0.017   | 0                       | 0.914   | -0.009          | -0.029;0.011   | 0                       | 0.368   |
| LV end-diastolic volume (ml)      | -0.004          | -0.020;0.010   | 0                       | 0.663   | -0.003          | -0.025;0.019   | 0                       | 0.807   |
| LV stroke volume (ml)             | -0.007          | -0.024;0.011   | 0                       | 0.454   | 0.003           | -0.021;0.028   | -                       | 0.777   |
| Ejection Fraction (%)             | -0.006          | - 0.024: 0.011 | -                       | 0.470   | 0.013           | -0.016: 0.041  | -                       | 0.382   |
| Cardiac output (L/min)            | -0.021          | -0.039;-0.002  | 19                      | 0.027   | -0.028          | -0.053: -0.003 | -                       | 0.026   |

Numbers represents the percentage mediation on the total effect, weighted toward the BMI distribution of the general population in the adjusted models. The model was adjusted for age, sex, smoking, ethnicity and education. CI = confidence interval, LV = left ventricle. Unadjusted values for multiple comparisons with  $p < 0.05$  were considered significant. *Italic depicted values meet the Bonferroni corrected significance level of  $p < 0.007$ .*
